# Supplementary material
Source: PubMed Central journal article supplement (PMC2948755)
Supplement: NIHMS161581-supplement-2.pdf [file NIHMS161581-supplement-2.pdf]

Supplemental Figure 1. *Par6* overexpression does not alter late stage acinar organization. Immunofluorescence staining of Day 20 acini structures grown in 0.5 ng/ml EGF with the basal marker Laminin V (Red) and co-stained with DAPI to monitor nuclei. Scale bar represents 20  $\mu$ m.

Supplemental Figure 2. *Par6 $\beta$*  overexpression promotes proliferation in 2D, 3D and activates MAPK (A) *Flag-Par6 $\beta$*  is overexpressed in MCF-10A cells. Cell extract from vector control and *Par6 $\beta$*  expressing cells were immunoblotted with anti-flag and reprobbed with anti- $\beta$ -actin antibodies. (B) *Par6 $\beta$*  overexpression promotes EGF-independent cell proliferation. Cell cycle analysis of cells grown for 3 days in EGF free media. Data are fold increase in S-phase of *Par6 $\beta$*  cells compared to control cells and are means  $\pm$  s.d. of three independent experiments. (C) *Par6 $\beta$*  overexpression promotes acini cell proliferation. Distribution of acini size (circumferential area) of Day 12 structures grown in 0.5ng/ml EGF. Each condition represents approximately 800 acini structures from three independent experiments. The P-value between Vector and *Par6 $\beta$*  is less than 0.0001 calculated by Wilcoxon rank-sum test. (D) *Par6 $\beta$*  overexpression activates MAPK signaling. Cell extracts that were stimulated for 0,15, 60 and

120 minutes with 2 ng/ml EGF were immunoblotted with antibodies specific for phosphorylated ERK1/2 and reprobed with total ERK2.

Supplemental Figure 3. *Par6 overexpression increases the cell number/acini.* (A) Distribution of nuclei per acini structure. Day four acini structures grown in 0.5 ng/ml EGF were stained with DAPI to monitor nuclei. Each nuclei within each acini was counted. The data represents approximately 300 acini.

Supplemental Figure 4. *Par6 overexpression promotes hyperplastic acinar structures and does not alter apoptosis in acinar structures.* (A) *Par6 overexpression promotes proliferation in late stage acinar structures.* Quantitation of Day 16 and Day 20 acini with at least one positive Ki-67 positive nuclei within the acinar structure. Acini were grown in 0.5ng/ml EGF. Data for Day 16 are represented as percent Ki-67 positive structures +/- s.d. Each bar represents approximately 700 acini from three independent experiments. Data from Day 20 are represented as percent Ki-67 positive acinar structures from approximately 200 acini from one experiment. (B) *Par6 expression does not alter the onset of cell death during acinar morphogenesis.* Day 7 acinar structures derived from Par6 expressing or vector control cells were incubated with ethidium bromide to mark the cells that underwent cell death during acinar morphogenesis. Scale bar represents 100  $\mu$ m. (C) *Par6 overexpression does not promote apoptosis in late stage acinar structures.* Immunofluorescence staining of Day 20 acini structures grown in 0.5 ng/ml EGF with the apoptotic marker cleaved-caspase-3 (Green) and co-stained with DAPI to monitor nuclei. The lack of cleaved-caspase-3 staining demonstrates that as expected there is no apoptosis within the lumen of the acinar structures. Scale bar represents 50  $\mu$ m.

Supplemental Figure 5. *Par6 promotes proliferation of mammary epithelial cells.*

(A) Phase contrast images showing growth inhibited vector control MCF-10A cells compared to growing Par6 $\alpha$  overexpressing cells in EGF free media. The scale bar represents 100  $\mu$ m. (B) Cell cycle analysis of cells grown for 3 days in EGF free media. Data are fold increase in S-phase of Par6 cells compared to control cells and are means  $\pm$  s.d. of three independent experiments. (C) Phase images showing growth-inhibited vector control Comma1D cells compared to growing Par6 $\alpha$  overexpressing in EGF free media. The scale bar represents 100  $\mu$ m. (D) Proliferation analyses of cells grown for three days in EGF free media by estimating the cell number with a hemocytometer. Data are means  $\pm$  s.d. from three independent experiments. (E) Phase contrast images of larger Par6 $\alpha$  overexpressing HC11 acini structures compared to vector control grown in 0.5 ng/ml EGF for 12 day. Scale bar represents 100  $\mu$ m. (F) Par6 overexpression significantly increases HC11 acini size compared to vector control. Distribution of acini size (circumferential area) of day 12 HC11 acini structures grown in 0.5 ng/ml EGF. Data is plotted as a box plot and represents approximately 200 acini (P=0.03).

Supplemental Figure 6. *Par6 mutations do not activate MAPK.* MCF-10A cell extracts that were stimulated for 0 and 60 minutes with 2 ng/ml EGF were immunoblotted with antibodies specific for phosphorylated ERK1/2 and reprobed with total ERK2.

Supplemental Figure 7. *Par6b is overexpressed in ER positive tumors.*

Meta-analysis of published databases using OncoPrint an integrated data platform (31). (A) Analysis of 69 ER $^-$  and 226 ER $^+$  breast carcinoma, P-value = 2.4E-23 (33). (B) Analysis of 11

ER<sup>-</sup> and 24 ER<sup>+</sup> breast carcinoma, P-value = 4.6E-7 (34). (C) Analysis of 28 ER<sup>-</sup> and 27 ER<sup>+</sup> breast carcinoma, P-value = 9.5E-7(23). (D) Analysis of 9 ER<sup>-</sup> and 26 ER<sup>+</sup> breast carcinoma, P-value = 7.1E-4 (32).

Supplemental Figure 8. Tamoxifen does not regulate *Pard6b* levels in MCF-7 cells.

Quantitative PCR analysis of Par6 $\beta$  gene expression using cDNA generated from MCF-7 cells. Data is represented as fold increase over MCF-7 untreated control after normalization to b-actin gene expression. MCF-7 cells were grown for 3 days in media containing charcoal treated fetal bovine serum and treated with tamoxifen for 3 hours before RNA extraction.
