# Supplementary material
Source: PubMed Central journal article supplement (PMC2948755)
Supplement: NIHMS161581-supplement-Supplementary_Figures.pdf [file NIHMS161581-supplement-Supplementary_Figures.pdf]

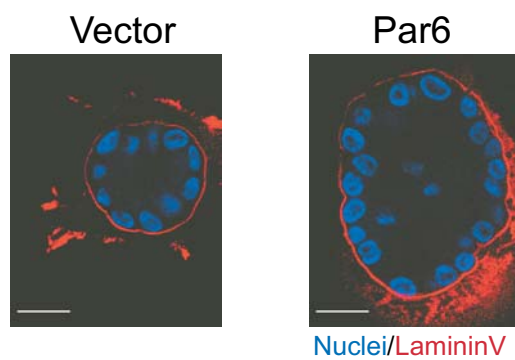

Supplemental Figure 1

A

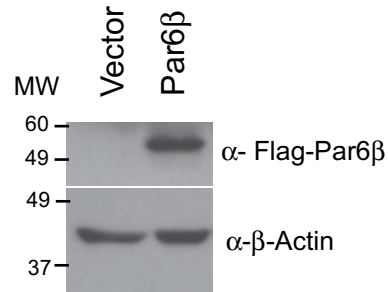

C

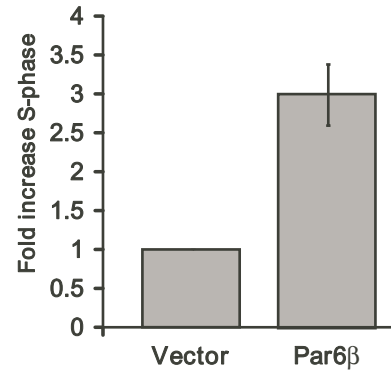

B

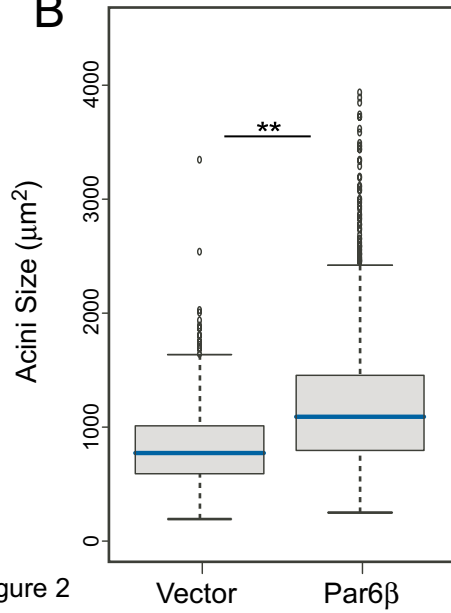

D

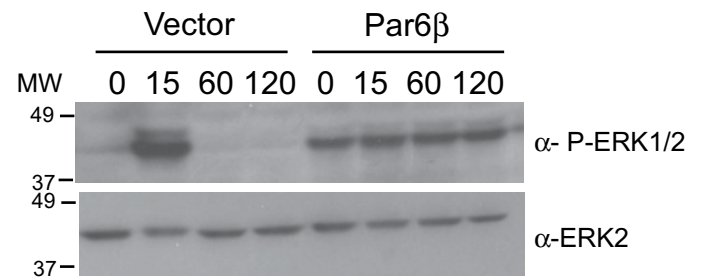

Supplemental Figure 2

Supplemental Figure 3

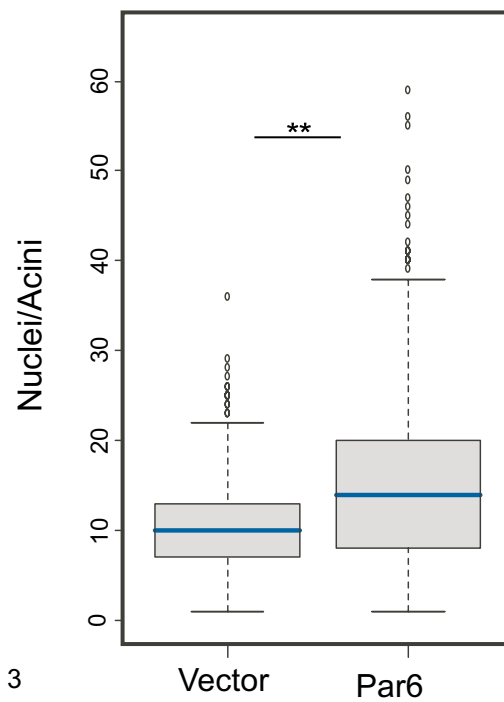

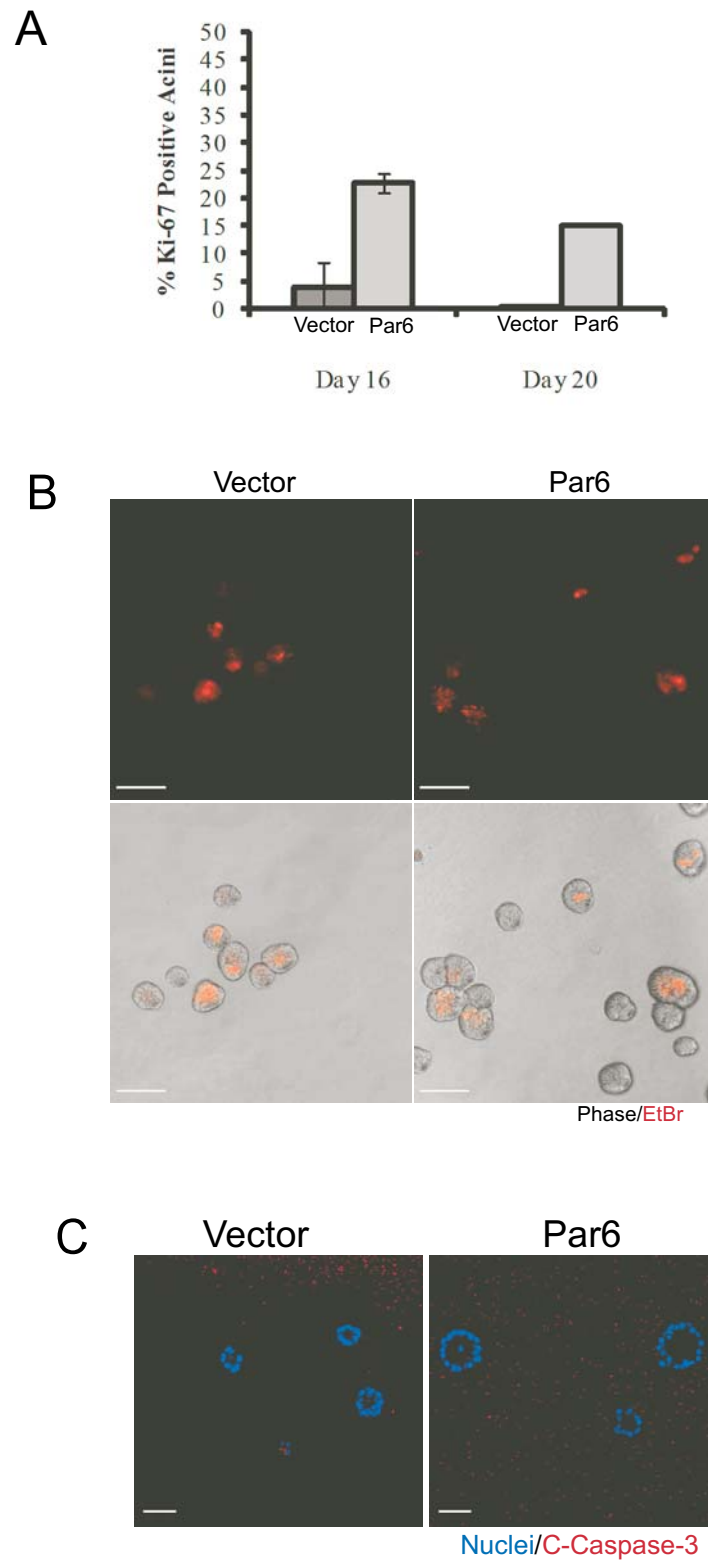

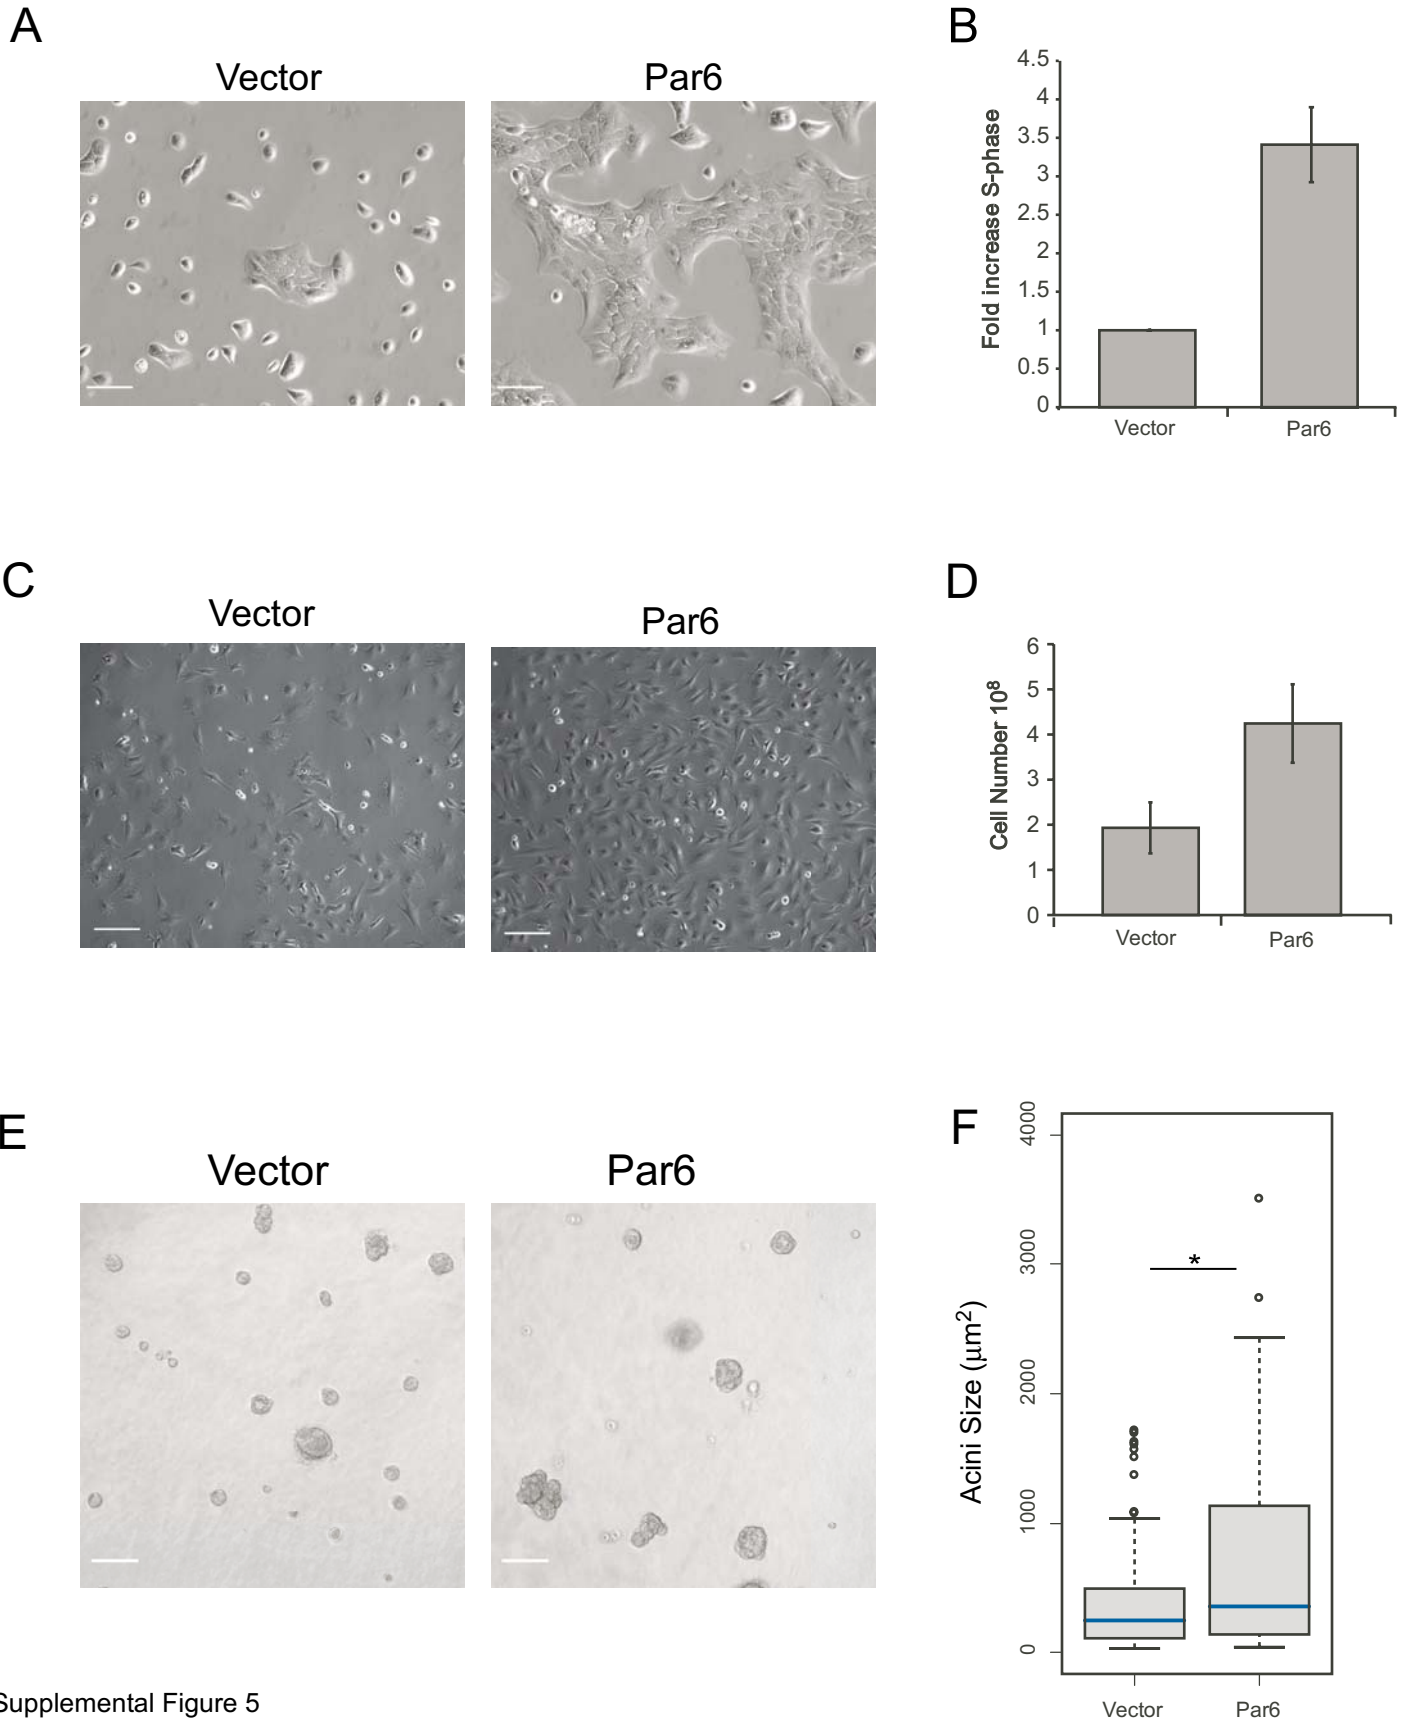

Supplemental Figure 5

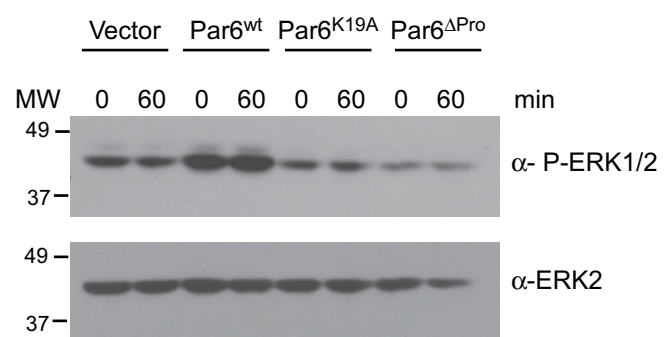

Supplemental Figure 6

## PARD6B

Par-6 partitioning defective 6 homolog beta (*c. elegans*)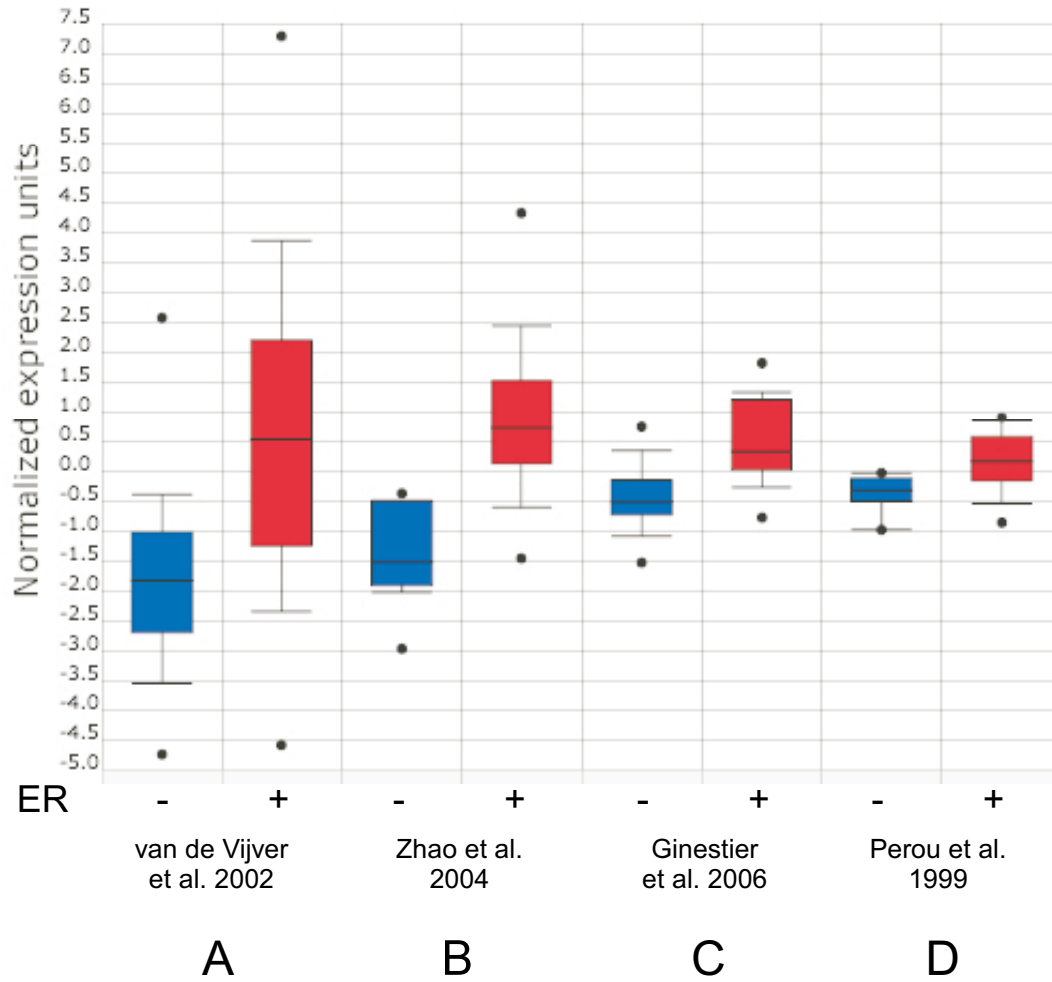

Supplemental Figure 7

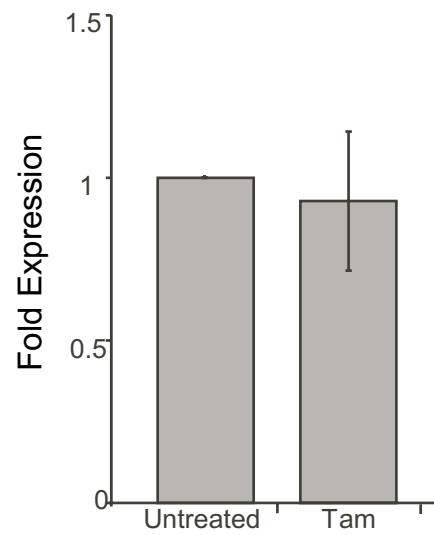

Supplemental Figure 8
